# Supplementary material
Source: ML conference proceedings conference paper supplement (https://aclanthology.org/D19-1149)
Supplement: Attachment [file D19-1149.Attachment.zip]

## A Appendix

### A.1 Data

**NMT** For DE→EN, we use *newstest2013* as the validation set, and use *newstest2017* as the test set. For DE→FR, we use *newstest2013* as the evaluation set, and use *newstest2012* as the test set.

### A.2 Experimental Settings

**NMT** We implemented *RNNS2S* models with stacked bi-directional RNNs and implemented the self-attention in Transformer encoders to output the attention distributions. We use *Adam* (Kingma and Ba, 2015) as the optimizer. The initial learning rate is set to 0.0002. All the neural networks have 6 layers.<sup>5</sup> The size of embeddings and hidden units is 512. The attention mechanism in *Transformer* has 8 heads. We learn a joint BPE model with 32,000 subword units (Sennrich et al., 2016). All BLEU scores are computed with *SacreBLEU* (Post, 2018).

**WSD Classification** The classifiers are feed-forward neural networks with only one hidden layer, using ReLU non-linear activation. The size of the hidden layer is set to 512. We use Adam learning algorithm as well with mini-batches of size 3,000. The classifiers are trained using a cross-entropy loss. Each classifier is trained for 80 epochs<sup>6</sup> and the one performs best on the development set is selected for evaluation.

---

<sup>5</sup>The RNN encoder is a stack of three bi-directional RNNs which is equivalent to 6 uni-directional RNNs.

<sup>6</sup>The classifiers fed decoder states are trained 200 epochs to converge.
